# Supplementary material for: Spectrum and Frequency of Germline FANCM Protein-Truncating Variants in 44,803 European Female Breast Cancer Cases
Source: MDPI journal article supplement (doi:10.3390/cancers15133313), 2023-06-23
Supplement: s1 [file s1]

**Table S1.** Description of the 39 studies included in the present analysis.

| Study                                                                              | Abbreviation | Country     | Study design                                                                                    | Number of breast cancer tested | No. of FANCM PTV carriers |
|------------------------------------------------------------------------------------|--------------|-------------|-------------------------------------------------------------------------------------------------|--------------------------------|---------------------------|
| Amsterdam Breast Cancer Study                                                      | ABCS         | Netherlands | Hospital-based consecutive cases; population-based controls                                     | 1,007                          | 9                         |
| Amsterdam Breast Cancer Study - Familial                                           | ABCS-F       | Netherlands | Clinical Genetic Center-based cases                                                             | 208                            | 2                         |
| Bavarian Breast Cancer Cases and Controls                                          | BBCC         | Germany     | Hospital-based cases; population based controls                                                 | 243                            | 2                         |
| Breast Cancer in Galway Genetic Study                                              | BIGGS        | Ireland     | Hospital-based cases; population based controls                                                 | 369                            | 2                         |
| Breast Oncology Galicia Network                                                    | BREOGAN      | Spain       | Population-based case-control                                                                   | 595                            | 3                         |
| Breast Cancer Study of the University of Heidelberg                                | BSUCH        | Germany     | Hospital-based cases; healthy blood donor controls                                              | 241                            | 1                         |
| Crete Cancer Genetics Program                                                      | CCGP         | Greece      | Hospital-based case-control study                                                               | 472                            | 0                         |
| CECILE Breast Cancer Study                                                         | CECILE       | France      | Population-based case-control study                                                             | 938                            | 2                         |
| Copenhagen General Population Study                                                | CGPS         | Denmark     | Population-based case-control study                                                             | 2,800                          | 12                        |
| Spanish National Cancer Centre Breast Cancer Study                                 | CNIO-BCS     | Spain       | Case-control study                                                                              | 531                            | 0                         |
| Family History Risk Study                                                          | FHRISK       | UK          | Clinic-based cohort study with a nested case-control study                                      | 79                             | 1                         |
| German Consortium for Hereditary Breast & Ovarian Cancer                           | GC-HBOC      | Germany     | Clinic-based case study and prospective cohort study                                            | 2,565                          | 20                        |
| Gene Environment Interaction and Breast Cancer in Germany                          | GENICA       | Germany     | Population-based case-control study                                                             | 848                            | 9                         |
| Generation Scotland                                                                | GENSCOT      | Scotland    | Prospective family-based cohort study; nested case-control                                      | 427                            | 0                         |
| Genetic Epidemiology Study of Breast Cancer by Age 50                              | GESBC        | Germany     | Population-based study of women <50 years                                                       | 547                            | 4                         |
| Hannover Breast Cancer Study                                                       | HABCS        | Germany     | Hospital-based case-control study                                                               | 967                            | 1                         |
| Hereditair Borst-en eierstokkanker Onderzoek Nederland                             | HEBON        | Netherlands | Clinical genetic center-based recruitment of familial breast or ovarian cancer patients (cases) | 1,453                          | 12                        |
| Hannover- Minsk Breast Cancer Study                                                | HMBCS        | Belarus     | Hospital-based cases; population based controls                                                 | 319                            | 2                         |
| Hannover-Ufa Breast Cancer Study                                                   | HUBCS        | Russia      | Hospital-based cases; population based controls                                                 | 239                            | 1                         |
| Karolinska Breast Cancer Study                                                     | KARBAC       | Sweden      | Population and hospital-based cases; geographically matched controls                            | 366                            | 4                         |
| Karolinska Mammography Project for Risk Prediction of Breast Cancer - Cohort Study | KARMA        | Sweden      | Cohort study                                                                                    | 3,087                          | 37                        |
| Kuopio Breast Cancer Project                                                       | KBCP         | Finland     | Population-based prospective clinical cohort                                                    | 560                            | 14                        |

|                                                                                                                    |              |                           |                                                                                                                                            |        |     |
|--------------------------------------------------------------------------------------------------------------------|--------------|---------------------------|--------------------------------------------------------------------------------------------------------------------------------------------|--------|-----|
| Kathleen Cuninghams Foundation Consortium for research into Familial Breast Cancer/Australian Ovarian Cancer Study | KCONFAB/AOCS | Australia and New Zealand | Clinic-based recruitment of familial breast cancer patients (cases); population-based case-control study of ovarian cancer (controls only) | 1,418  | 8   |
| Mammary Carcinoma Risk Factor Investigation                                                                        | MARIE        | Germany                   | Population-based case-control study                                                                                                        | 2,295  | 10  |
| Cyprus Breast Cancer Case Control Study                                                                            | MASTOS       | Cyprus                    | Population-based case-control study                                                                                                        | 974    | 0   |
| Milan Breast Cancer Study Group                                                                                    | MBCSG        | Italy                     | Clinic-based recruitment of familial/early onset breast cancer patients (cases); population-based controls                                 | 933    | 6   |
| Melbourne Collaborative Cohort Study                                                                               | MCCS         | Australia                 | Prospective cohort study: nested case-control study                                                                                        | 1,042  | 5   |
| Norwegian Breast Cancer Study                                                                                      | NBCS         | Norway                    | Hospital-based case-control study                                                                                                          | 565    | 3   |
| Ontario Familial Breast Cancer Registry                                                                            | OFBCR        | Canada                    | Population-based familial case-control study                                                                                               | 491    | 1   |
| NCI Polish Breast Cancer Study                                                                                     | PBCS         | Poland                    | Population-based case-control study                                                                                                        | 1,757  | 7   |
| Karolinska Mammography Project for Risk Prediction of Breast Cancer - Case-Control Study                           | PKARMA       | Sweden                    | Population-based study                                                                                                                     | 23     | 0   |
| The Prostate, Lung, Colorectal and Ovarian (PLCO) Cancer Screening Trial                                           | PLCO         | USA                       | Prospective cohort study: nested case-control                                                                                              | 2,041  | 10  |
| Predicting the Risk Of Cancer At Screening Study                                                                   | PROCAS       | UK                        | Population based study                                                                                                                     | 495    | 4   |
| Rotterdam Breast Cancer Study                                                                                      | RBCS         | Netherlands               | Clinical Genetic Center-based case-control study, Rotterdam area                                                                           | 1,037  | 7   |
| Singapore and Sweden Breast Cancer Study                                                                           | SASBAC       | Sweden                    | Population-based case-control study                                                                                                        | 1,131  | 14  |
| Study of Epidemiology and Risk factors in Cancer Heredity                                                          | SEARCH       | UK                        | Population-based case-control study                                                                                                        | 9,682  | 47  |
| Städtisches Klinikum Karlsruhe Deutsches Krebsforschungszentrum Study                                              | SKDKFZS      | Germany                   | Hospital-based breast cancer cohort                                                                                                        | 953    | 4   |
| IHCC-Szczecin Breast Cancer Study                                                                                  | SZBCS        | Poland                    | Hospital-based case-control study                                                                                                          | 346    | 1   |
| Utah Breast Cancer Study                                                                                           | UBCS         | USA                       | Population-based and hospital-based case-control study, plus additional familial cases                                                     | 759    | 9   |
| All studies                                                                                                        |              |                           |                                                                                                                                            | 44,803 | 274 |
